# Supplementary material for: La ricostruzione del paesaggio antropico di età romana in siti a morfologie variabili: la Laguna di Venezia da Brundulum ad Equilum
Source: Royal Society of Chemistry journal article supplement (doi:10.1039/d1dt01649k), 2010-01-28
Supplement: d1dt01649k1.pdf [file d1dt01649k1.pdf]

## Supporting Information

### Cobalt Coordination Controlled Carbon Nanospheres Formation and Inclusion of Amorphous $\text{Co}_3\text{O}_4$ and AuNPs: Strongly Enhanced Oxygen Evolution Reaction with Excellent Mass Activity

*Pandi Muthukumar,<sup>a</sup> Shreya Narasimhan,<sup>a</sup> Arunprasanth Panneer Selvam,<sup>b</sup> Mariappan Mariappan,<sup>b</sup> Mohammed A. Assiri<sup>c</sup> and Savarimuthu Philip Anthony<sup>\*a</sup>*

<sup>a</sup>Department of Chemistry, School of Chemical & Biotechnology, SASTRA Deemed University, Thanjavur-613401, Tamil Nadu, India. Fax: +914362264120;

Tel: +914362264101, E-mail: [philip@biotech.sastra.edu](mailto:philip@biotech.sastra.edu).

<sup>b</sup>Department of Chemistry, SRM IST, Kattankulathur, Chennai-603203, Tamil Nadu, India.

<sup>c</sup>Department of Chemistry, King Khalid University, Abha 61413, Saudi Arabia.

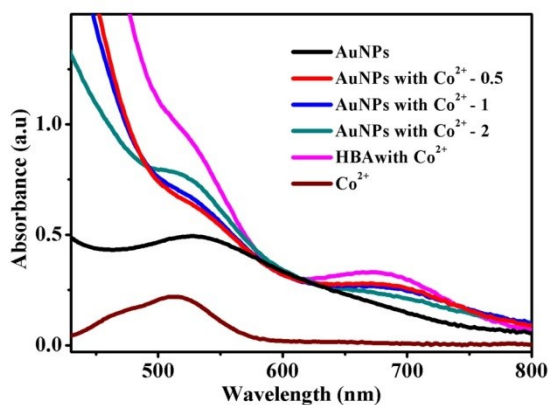

Figure S1. Absorption spectra of HBA, HBA@AuNPs,  $\text{Co}^{2+}$  ions and coordination with HBA ligand.

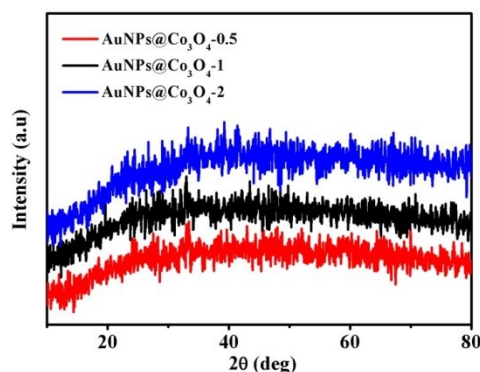

Figure S2. PXRD pattern of 1, 2 and 3.

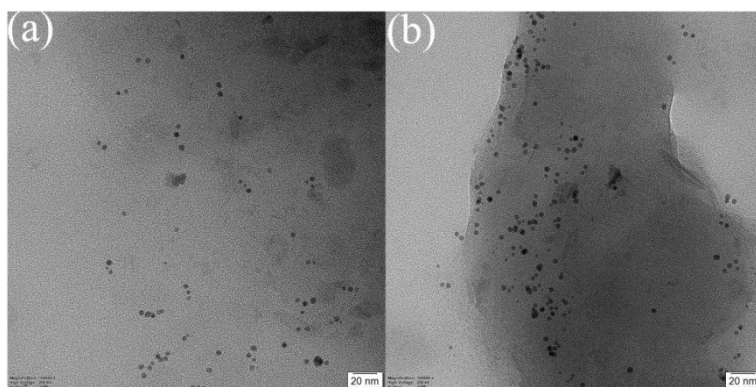

Figure S3. HR-TEM images of AuNPs synthesised using HBA.

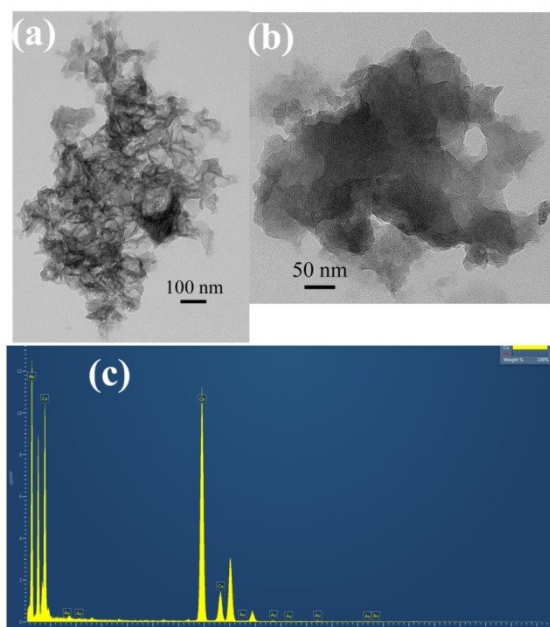

Figure S4. HR-TEM images (a, b) and EDX spectra (c) of **1**.

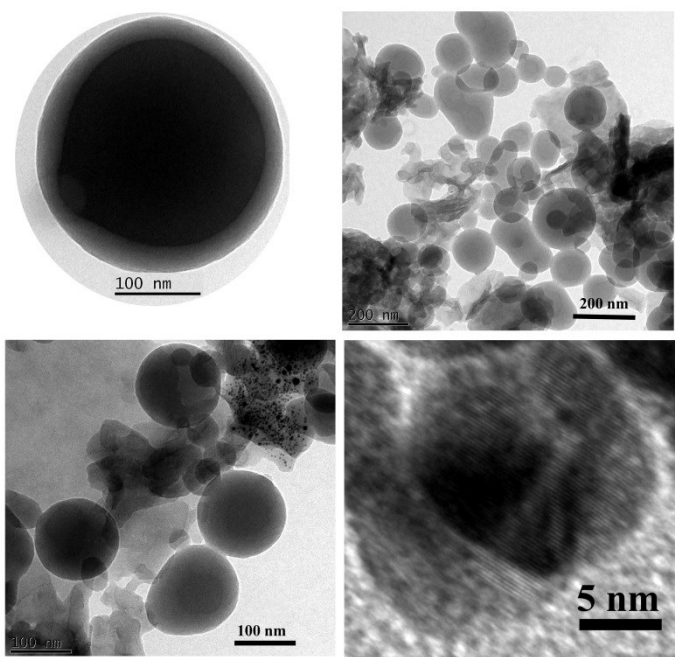

Figure S5. HR-TEM images of **2**.

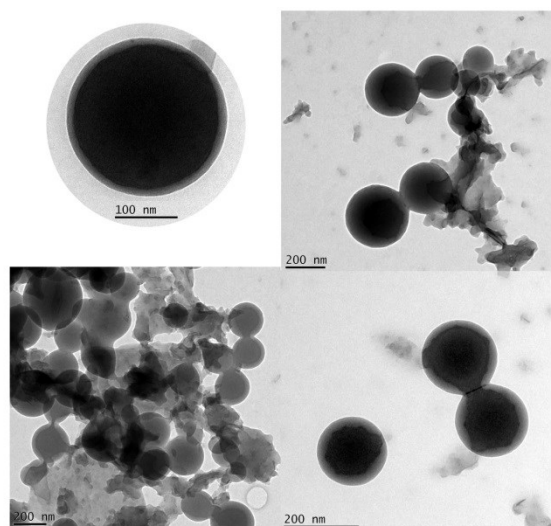

Figure S6. HR-TEM images of **3**.

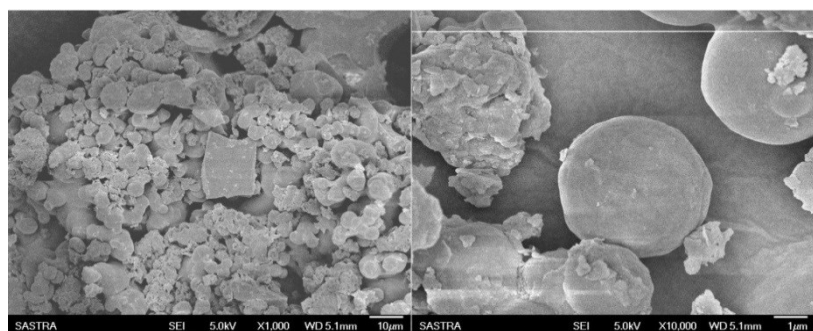

Figure S7. FE-SEM images of **2**.

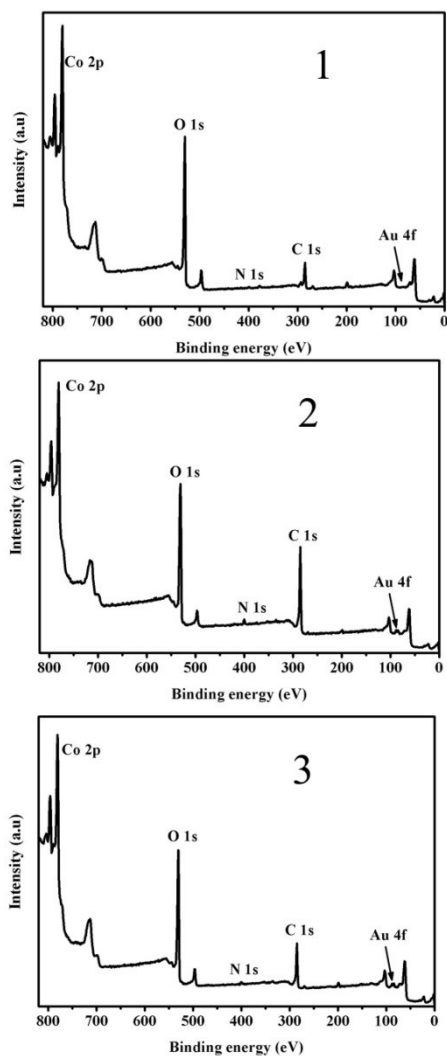

Figure S8. XPS survey spectra of **1-3**.

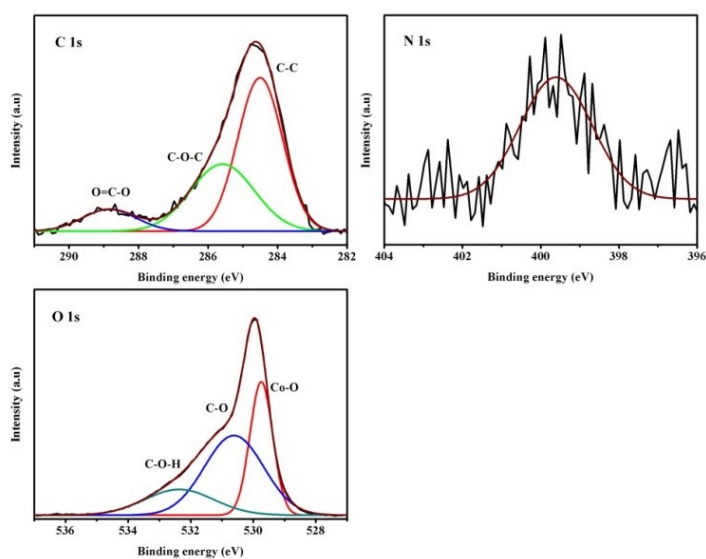

Figure S9. High resolution XPS spectra of C, N and O of **1**.

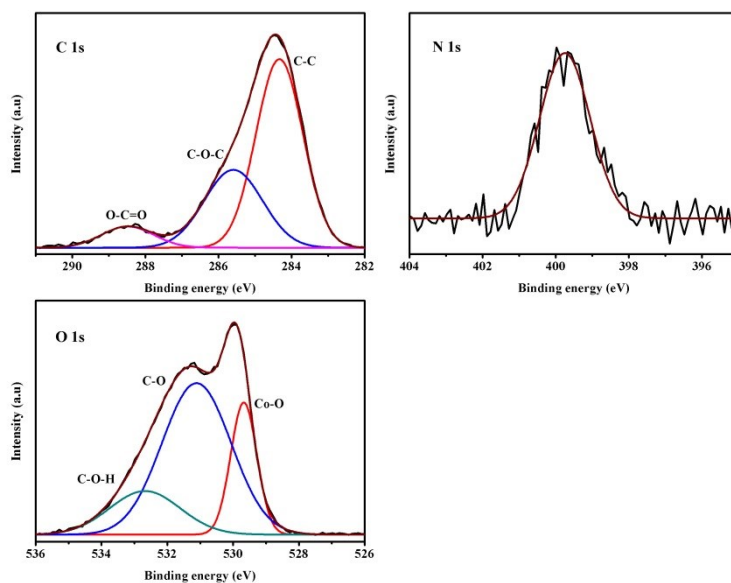

Figure S10. High resolution XPS spectra of C, N and O of **2**.

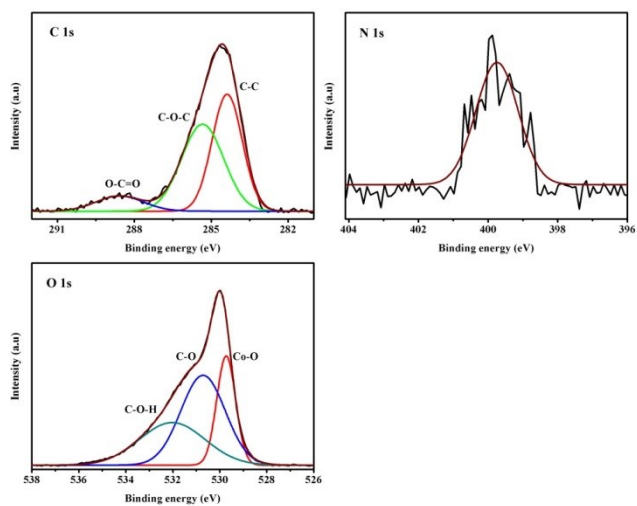

Figure S11. High resolution XPS spectra of C, N and O of **3**.

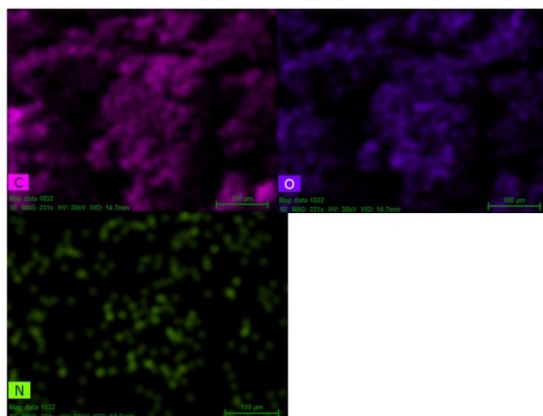

Figure S12. Elemental mapping of **1**.

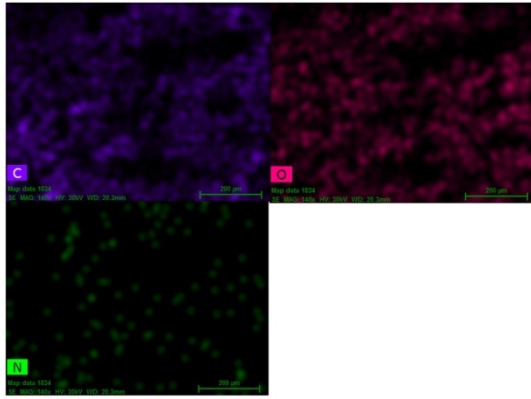

Figure S13. Elemental mapping of **2**.

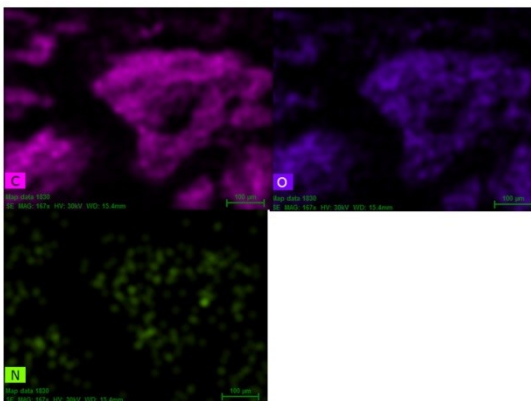

Figure S14. Elemental mapping of **3**.

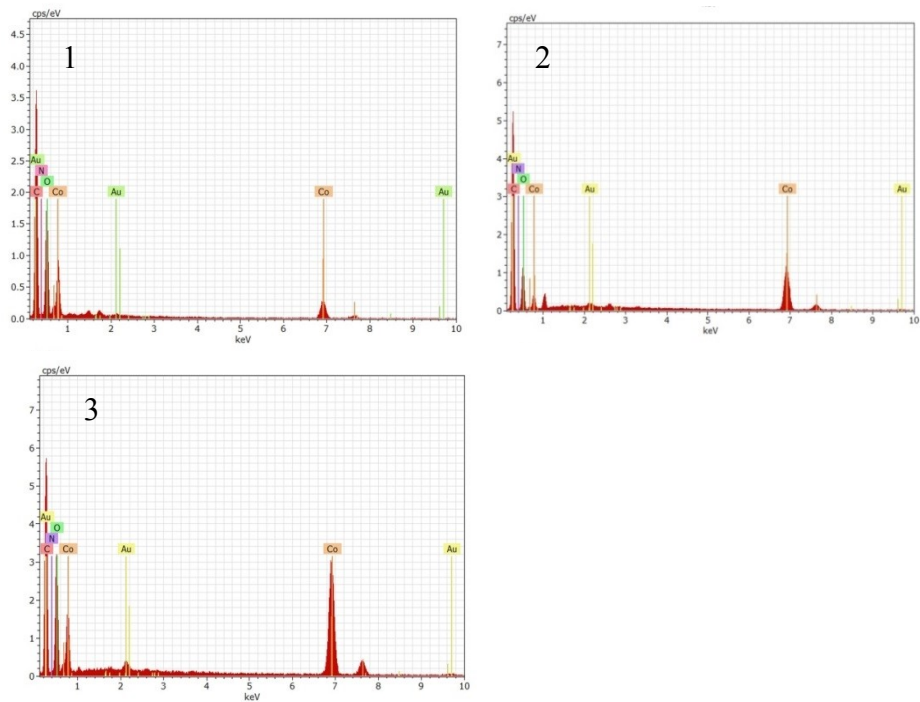

Figure S15. EDX spectra of (a) **1**, (b) **2** and (c) **3**.

Table S1. Au and Co percentage in 1-3.

| Catalyst | Element | wt% by EDAX |
|----------|---------|-------------|
| 1        | Au      | 0.01        |
|          | Co      | 0.46        |
| 2        | Au      | 0.04        |
|          | Co      | 1.74        |
| 3        | Au      | 0.05        |
|          | Co      | 2.86        |

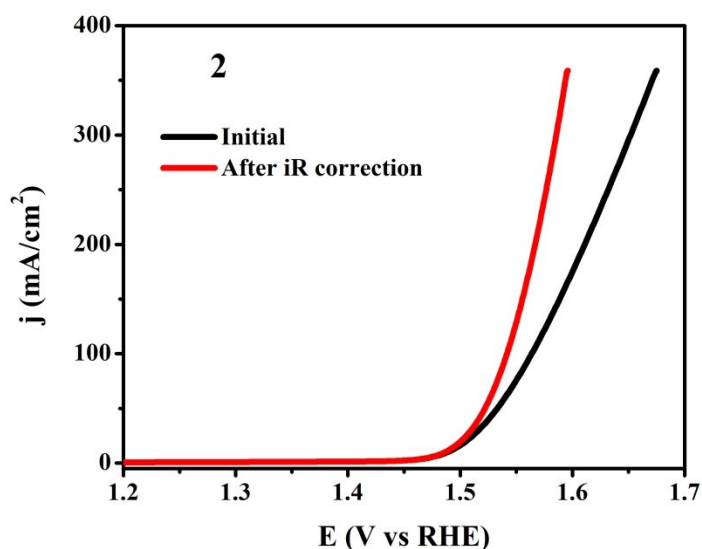

Figure S16. Linear sweep OER polarization curve of 2 before and after iR correction.

Table S2. OER data of different catalysts.

| Catalyst                                  | Overpotential (mV) | Tafel slope (mV/dec) | Stability                    | Reference           |
|-------------------------------------------|--------------------|----------------------|------------------------------|---------------------|
| <b>2</b>                                  | <b>256</b>         | <b>52.4</b>          | <b>1000 cycle &amp; 48 h</b> | <b>Present work</b> |
| Au/NiCo <sub>2</sub> O <sub>4</sub>       | 360                | 63                   | 1000 cycle & 120 min         | 1                   |
| Au/m Co <sub>3</sub> O <sub>4</sub>       | 440                | 46                   | 2000 cycle                   | 2                   |
| MnO <sub>2</sub> /AuNP-4.4                | 390                | ~200                 | NA                           | 3                   |
| CNTs-Au@Co <sub>3</sub> O <sub>4</sub>    | 350                | 68                   | 1000 cycle & 25 h            | 4                   |
| AuNCs@Ni(OH) <sub>2</sub>                 | 375                | 73                   | 600 cycle & 2 h              | 5                   |
| AuNCs@Co(OH) <sub>2</sub>                 | 350                | 72                   | 600 cycle                    | 6                   |
| AuNDs@LDH/GCE                             | 530                | 53                   | 2000 seconds                 | 7                   |
| NiCeOOH/Au                                | 259                |                      | NA                           | 8                   |
| NiFeOOH/Au                                | 267                |                      |                              | 8                   |
| ZnCo <sub>2</sub> O <sub>4</sub> /Au/CNTs | 440                | 46.2                 | 10 h                         | 9                   |
| AuCuCo                                    | 596                | 160                  | 4 h                          | 10                  |
| Au <sub>0.89</sub> Fe <sub>0.11</sub> NPs | 800                | 163                  | NA                           | 11                  |
| Au@NiO <sub>x</sub>                       | 394                | 117                  | 2 h                          | 12                  |



|                                                            |               |       |                   |    |
|------------------------------------------------------------|---------------|-------|-------------------|----|
| Au/FeO <sub>x</sub>                                        | 439           | 43    | 2 h               | 12 |
| Au@CoFeO <sub>x</sub>                                      | 328           | 58    | 2 h               | 12 |
| Au-Ni <sub>12</sub> P <sub>5</sub>                         | 340           | 49    | 2.78 h            | 13 |
| Au-Co(OH) <sub>2</sub>                                     | 320           | 119   | 6 h               | 14 |
| Au <sub>25</sub> /CoSe <sub>2</sub>                        | 430           | NA    | 1000 cycle        | 15 |
| Au-Ru NPs                                                  | 220           | 62    | NA                | 16 |
| AuNPs@LDH                                                  | 510           | 61    | 1.5 h             | 17 |
| Au/NiFe LDH                                                | 237           | 36    | 2000 cycle & 20 h | 18 |
| AuNi-Cu <sub>2</sub> O<br>(after 2 <sup>nd</sup> OER test) | 532           | NA    | 10 h              | 19 |
| AuNi HDs                                                   | 350           | 45.9  | 2 h               | 20 |
| Au-Fe <sub>x</sub> O <sub>y</sub> 12                       | 450           | 132   | 5 h               | 21 |
| Au <sub>0.10</sub> Ir <sub>0.90</sub> O <sub>y</sub> -50   | 241           | 55.2  | 5000 cycle        | 22 |
| Au/Ir NCs                                                  | 300           | 52.94 | 36 h              | 23 |
| Au-CoFe <sub>2</sub> O <sub>4</sub>                        | 312           | 35    | 8 h               | 24 |
| 3DG-Au-Ni <sub>3</sub> S <sub>2</sub>                      | 370 (91.15 j) | 106   | NA                | 25 |
| Au-vanadate nanoflute                                      | 310           | 127   | NA                | 26 |
| GMN@Co <sub>x</sub> S <sub>y</sub>                         | 345           | 138   | 6000 seconds      | 27 |

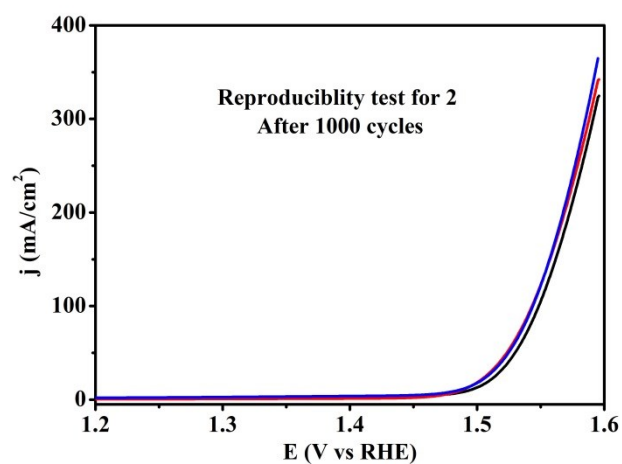

Figure S17. Comparison of linear sweep OER polarization curves of **2** synthesised at three different batches.

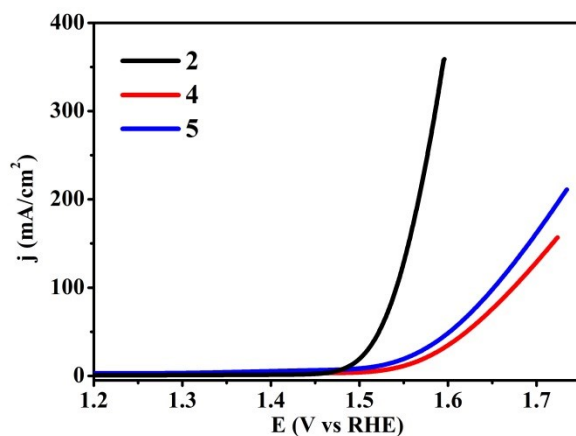

Figure S18. Comparison of linear sweep OER polarization curves of **2,4** and **5**.



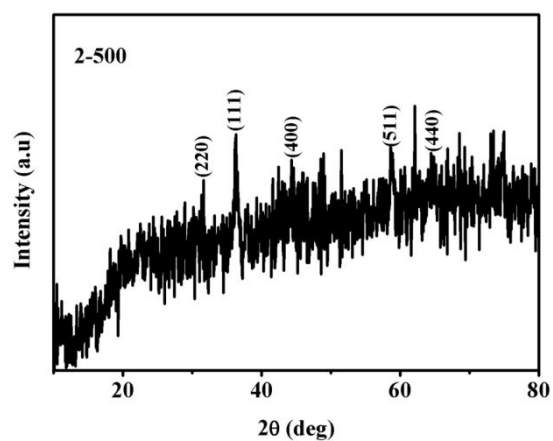

Figure S19. PXRD of **2** after heating at 500 °C.

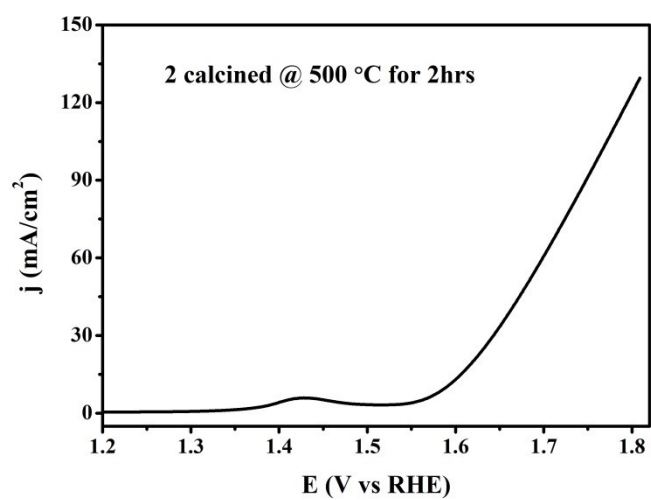

Figure S20. Linear sweep OER polarization curve of **2** after heating at 500 °C.

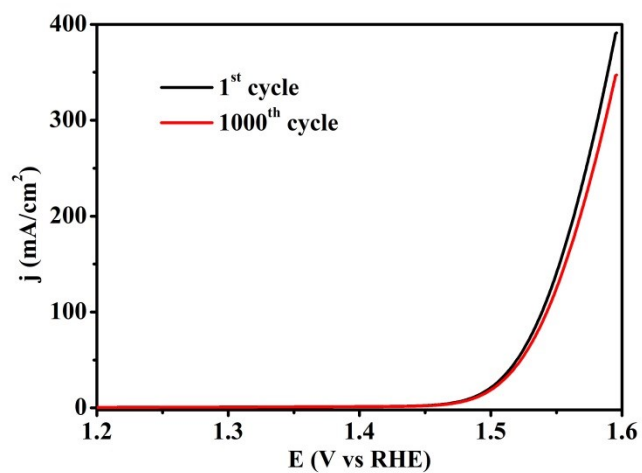

Figure S21. Linear sweep OER polarization curve of **2**.

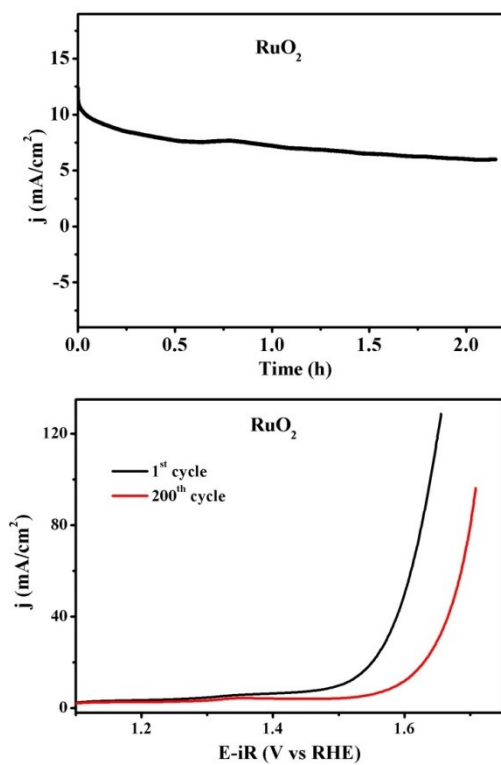

Figure S22. (a) Chronopotentiometric response and (b) OER polarization curve of RuO<sub>2</sub>.

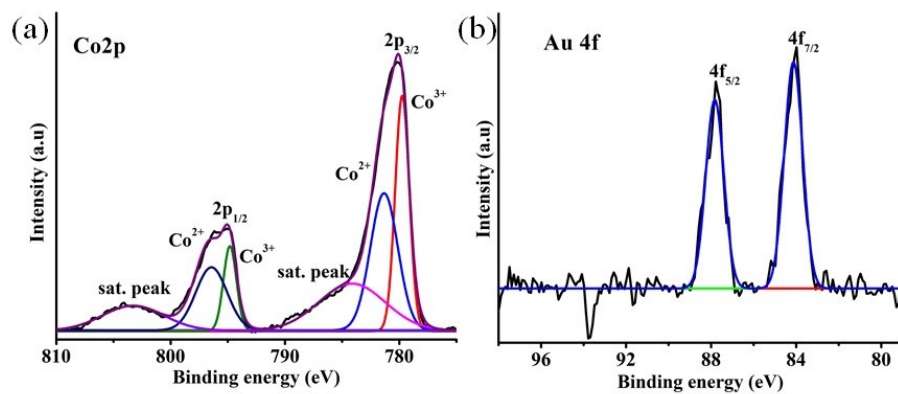

Figure S23. High resolution XPS spectra of (a) Co and (b) Au of **2** after catalytic studies.

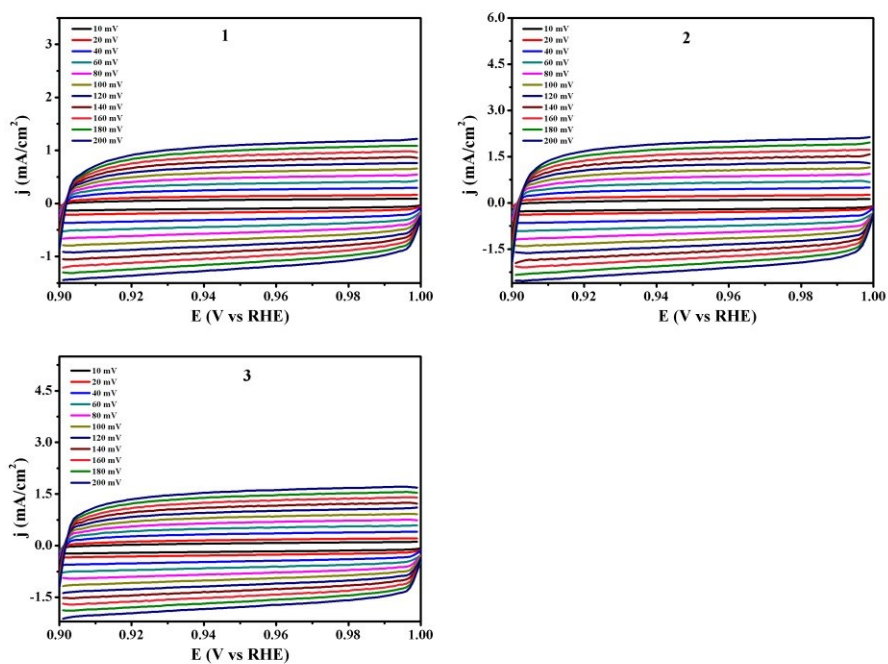

Figure S24. (a) CV of **1**, **2** and **3**.

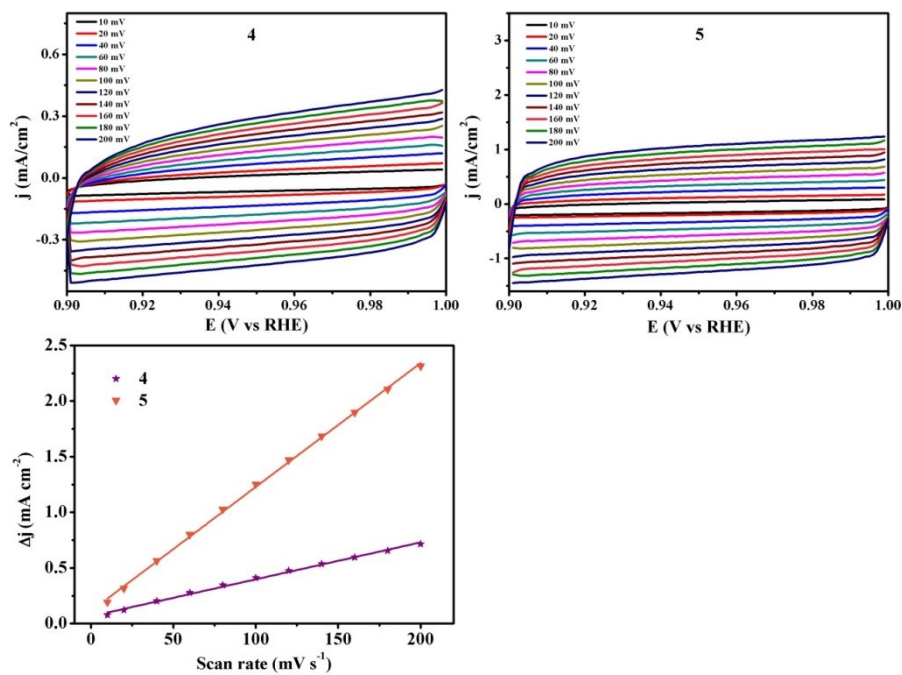

Figure S25. (a) CV of **4** and **5** and capacitive currents as a function of the scan rate for **2** and **4**.

Table S3. Comparison of mass activities of different catalysts.

| Catalyst                                                                                 | Loading (mg) | Overpotential (mV) | Current density (mA/cm <sup>2</sup> ) | Mass activity (mA mg <sup>-1</sup> ) | Ref       |
|------------------------------------------------------------------------------------------|--------------|--------------------|---------------------------------------|--------------------------------------|-----------|
| 2                                                                                        | 0.05         | 300                | 67.62                                 | 1352.5                               | This work |
| $\alpha$ -Ni(OH) <sub>2</sub>                                                            | 0.2          | 350                | 30.02                                 | 150.1                                | 28        |
| $\gamma$ -CoOOH                                                                          | 0.15         | 300                | 10                                    | 66.6                                 | 29        |
| CuCo <sub>2</sub> S <sub>4</sub>                                                         | 0.7          | 310                | 10                                    | 14.29                                | 30        |
| NiFe-LDH/CuO NRs/CF                                                                      | 0.70         | 300                | ~105                                  | 150                                  | 31        |
| Ba <sub>2</sub> CoMo <sub>0.5</sub> Nb <sub>0.5</sub> O <sub>6-<math>\delta</math></sub> | 0.232        | 440                | ~10                                   | ~43                                  | 32        |
| LaCo <sub>0.8</sub> Fe <sub>0.2</sub> O <sub>3-<math>\delta</math></sub> -700            | 0.245        | 293                | 10                                    | 40.80                                | 33        |
| Electrochemically activated Co <sub>x</sub> Ni <sub>1-x</sub> S <sub>2</sub>             | 0.285        | 340                | 60                                    | 217                                  | 34        |
| CeO <sub>2</sub> /Co <sub>3</sub> O <sub>4</sub>                                         | 0.35         | 340                | ~45                                   | 128.6                                | 35        |
| Au/NiFe LDH                                                                              | 2            | 280                | 129.8                                 | 64.9                                 | 18        |
| Co-S-130                                                                                 | 0.17         | 350                | ~13                                   | 76                                   | 36        |
| CoOOH-NS                                                                                 | 2            | 320                | ~45                                   | ~22.5                                | 37        |

## References:

- 1) X. Liu, J. Liu, Y. Li, Y. Li, X. Sun, *ChemCatChem* **2014**, *6*, 2501 – 2506.
- 2) X. Lu, Y. H. Ng, C. Zhao, *ChemSusChem* **2014**, *7*, 82 – 86.
- 3) C.-H. Kuo, W. Li, L. Pahalagedara, A. M. El-Sawy, D. Kriz, N. Genz, C. Guild, T. Ressler, S. L. Suib, J. He, *Angew. Chem. Inter. Ed.* **2015**, *127*, 2375-2380.
- 4) Y. Fang, X. Li, Y. Hu, F. Li, X. Lin, M. Tian, X. An, Y. Fu, J. Jin, J. Ma, *J. Power Sources* **2015**, **300**, 285-293.
- 5) Y. Zhou, H. C. Zeng, *J. Phys. Chem. C* **2016**, *120*, 29348–29357.
- 6) Y. Zhou, H. C. Zeng, *J. Phys. Chem. C* **2016**, *120*, 29348-29357.
- 7) M. Taci, E. Havakeshian, F. Hasheminasab, *RSC Adv.* **2017**, *7*, 47049–47055.
- 8) P. Chakthranont, J. Kibsgaard, A. Gallo, J. Park, M. Mitani, D. Sokaras, T. Kroll, R. Sinclair, M. B. Mogensen, T. F. Jaramillo, *ACS Catal.* **2017**, *7*, 5399–5409.
- 9) H. Cheng, C.-Y. Su, Z.-Y. Tan, S.-Z. Tai, Z.-Q. Liu, *J. Power Sources* **2017**, *357*, 1-10.
- 10) H. Gong, W. Zhang, F. Li, R. Yang, *Electrochimica Acta* **2017**, *252*, 261–267.
- 11) I. Vassalini, L. Borgese, M. Mariz, S. Polizzi, G. Aquilanti, P. Ghigna, A. Sartorel, V. Amendola, I. Alessandri, *Angew. Chem. Int. Ed.* **2017**, *56*, 6589-6593.
- 12) A. L. Strickler, M. Escudero-Escribano, T. F. Jaramillo, *Nano Lett.* **2017**, *17*, 6040–6046.
- 13) Y. Xu, S. Duan, H. Li, M. Yang, S. Wang, X. Wang, R. Wang, *Nano Res.* **2017**, *10*, 3103-3112.
- 14) M. A. Sayeeda, A. P. O'Mullane, *J. Mater. Chem. A* **2017**, *5*, 23776-23784.
- 15) S. Zhao, R. Jin, H. Abroshan, C. Zeng, H. Zhang, S. D. House, E. Gottlieb, H. J. Kim, J. C. Yang, R. Jin, *J. Am. Chem. Soc.* **2017**, *139*, 1077–1080.

- 16) L. Gloag, T. M. Benedetti, S. Cheong, Y. Li, X.-H. Chan, L.-M. Lacroix, S. L. Y. Chang, R. Arenal, I. Florea, H. Barron, A. S. Barnard, A. M. Henning, C. Zhao, W. Schuhmann, J. J. Gooding, R. D. Tilley, *Angew. Chem. Int. Ed.* **2018**, *54*, 10241-10245.
- 17) M. Tabei, E. Havakeshian, F. Hasheminasab, *J. Electroanal. Chem.* **2018**, *808*, 75–81.
- 18) J. Zhang, J. Liu, L. Xi, Y. Yu, N. Chen, S. Sun, W. Wang, K. M. Lange, B. Zhang, *J. Am. Chem. Soc.* **2018**, *140*, 3876–3879.
- 19) H. Gong, S. Lu, P. Strasser, R. Yang, *Electrochimica Acta* **2018**, *283*, 1411-1417.
- 20) B. Ni, P. He, W. Liao, S. Chen, L. Gu, Y. Gong, K. Wang, J. Zhuang, Li Song, G. Zhou, X. Wang, *Small* **2018**, *14*, 1703749.
- 21) S. A. Lone, S. Ghosh, K. K. Sadhu, *ACS Omega* **2019**, *4*, 3385–3391.
- 22) S. Moon, Y.-B. Cho, A. Yu, M. H. Kim, C. Lee, Y. Lee, *ACS Appl. Mater. Inter.* **2019**, *11*, 1979–1987.
- 23) Z. Ke, L. Li, Q. Jia, Y. Yang, H. Cui, *App. Surf. Sci.* **2019**, *463*, 58-65.
- 24) G. Zhu, X. Li, Y. Liu, W. Zhu, X. Shen, *App. Surf. Sci.* **2019**, *478*, 206-212.
- 25) H. Glatz, E. Lizundia, F. Pacifico D. Kundu, *ACS Appl. Ener. Mater.* **2019**, *22*, 1288-1294.
- 26) B. Das, M. Sharma, A. Hazarika, K. K. Bania, *ChemistrySelect* **2019**, *4*, 7042-7050.
- 27) H. D. Mai, V. C. T. Le, H. Yoo, *ACS Appl. Nano Mater.* **2019**, *2*, 678–688.
- 28) Minrui Gao, W. Sheng, Z. Zhuang, Q. Fang, S. Gu, J. Jiang, Y. Yan, *J. Am. Chem. Soc.* **2014**, *136*, 7077–7084.
- 29) J. Huang, J. Chen, T. Yao, J. He, S. Jiang, Z. Sun, Q. Liu, W. Cheng, F. Hu, Y. Jiang, Z. Pan, S. Wei, *Angew. Chem. Int. Ed.* **2015**, *54*, 8722–8727.
- 30) M. Chauhan, K. P. Reddy, C. S. Gopinath, S. Deka, *ACS Catal.* **2017**, *7*, 5871–5879.
- 31) Q. Zhou, T.-T. Li, J. Qian, W. Xu, Y. Hu, Y.-Q. Zheng, *ACS Appl. Ener. Mater.* **2018**, *1*, 1364–1373.
- 32) H. Sun, G. Chen, J. Sunarso, J. Dai, W. Zhou, Z. Shao, *ACS Appl. Mater. Inter.* **2018**, *10*, 16939–16942.
- 33) S. Song, J. Zhou, X. Su, Y. Wang, J. Li, L. Zhang, G. Xiao, C. Guan, R. Liu, S. Chen, H.-J. Lin, S. Zhang J.-Q. Wang, *Ener. Environ. Sci.* **2018**, *11*, 2945-2953.
- 34) Y.-R. Hong, S. Mhin, K.-M. Kim, W.-S. Han, H. Choi, G. Ali, K. Y. Chung, H. J. Lee, S.-I. Moon, S. Dutta, S. Sun, Y.-G. Jung, T. Song, H. Han, *J. Mater. Chem. A* **2019**, *7*, 3592-3602.
- 35) B. Qui, C. Wang, N. Zhang, L. Cai, Y. Xiong, Y. Chai, *ACS Catal.* **2019**, *97*, 6484-6490.
- 36) S. Ju, Y. Liu, H. Chen, F. Tan, A. Yuan, X. Li, G. Zhu, *ACS Appl. Ener. Mater.* **2019**, *2*, 4439-4449.
- 37) J. Zhou, Y. Wang, X. Su, S. Gu, R. Liu, Y. Huang, S. Yan, J. Li, S. Zhang, *Ener. Environ. Sci.* **2019**, *12*, 739-746.
